# Supplementary material for: Genomic profiling of exogenous abscisic acid-responsive microRNAs in tomato (Solanum lycopersicum)
Source: PubMed Central journal article supplement (PMC4891822; doi:10.1186/s12864-016-2591-8), 2016-06-03

# Data analysis process

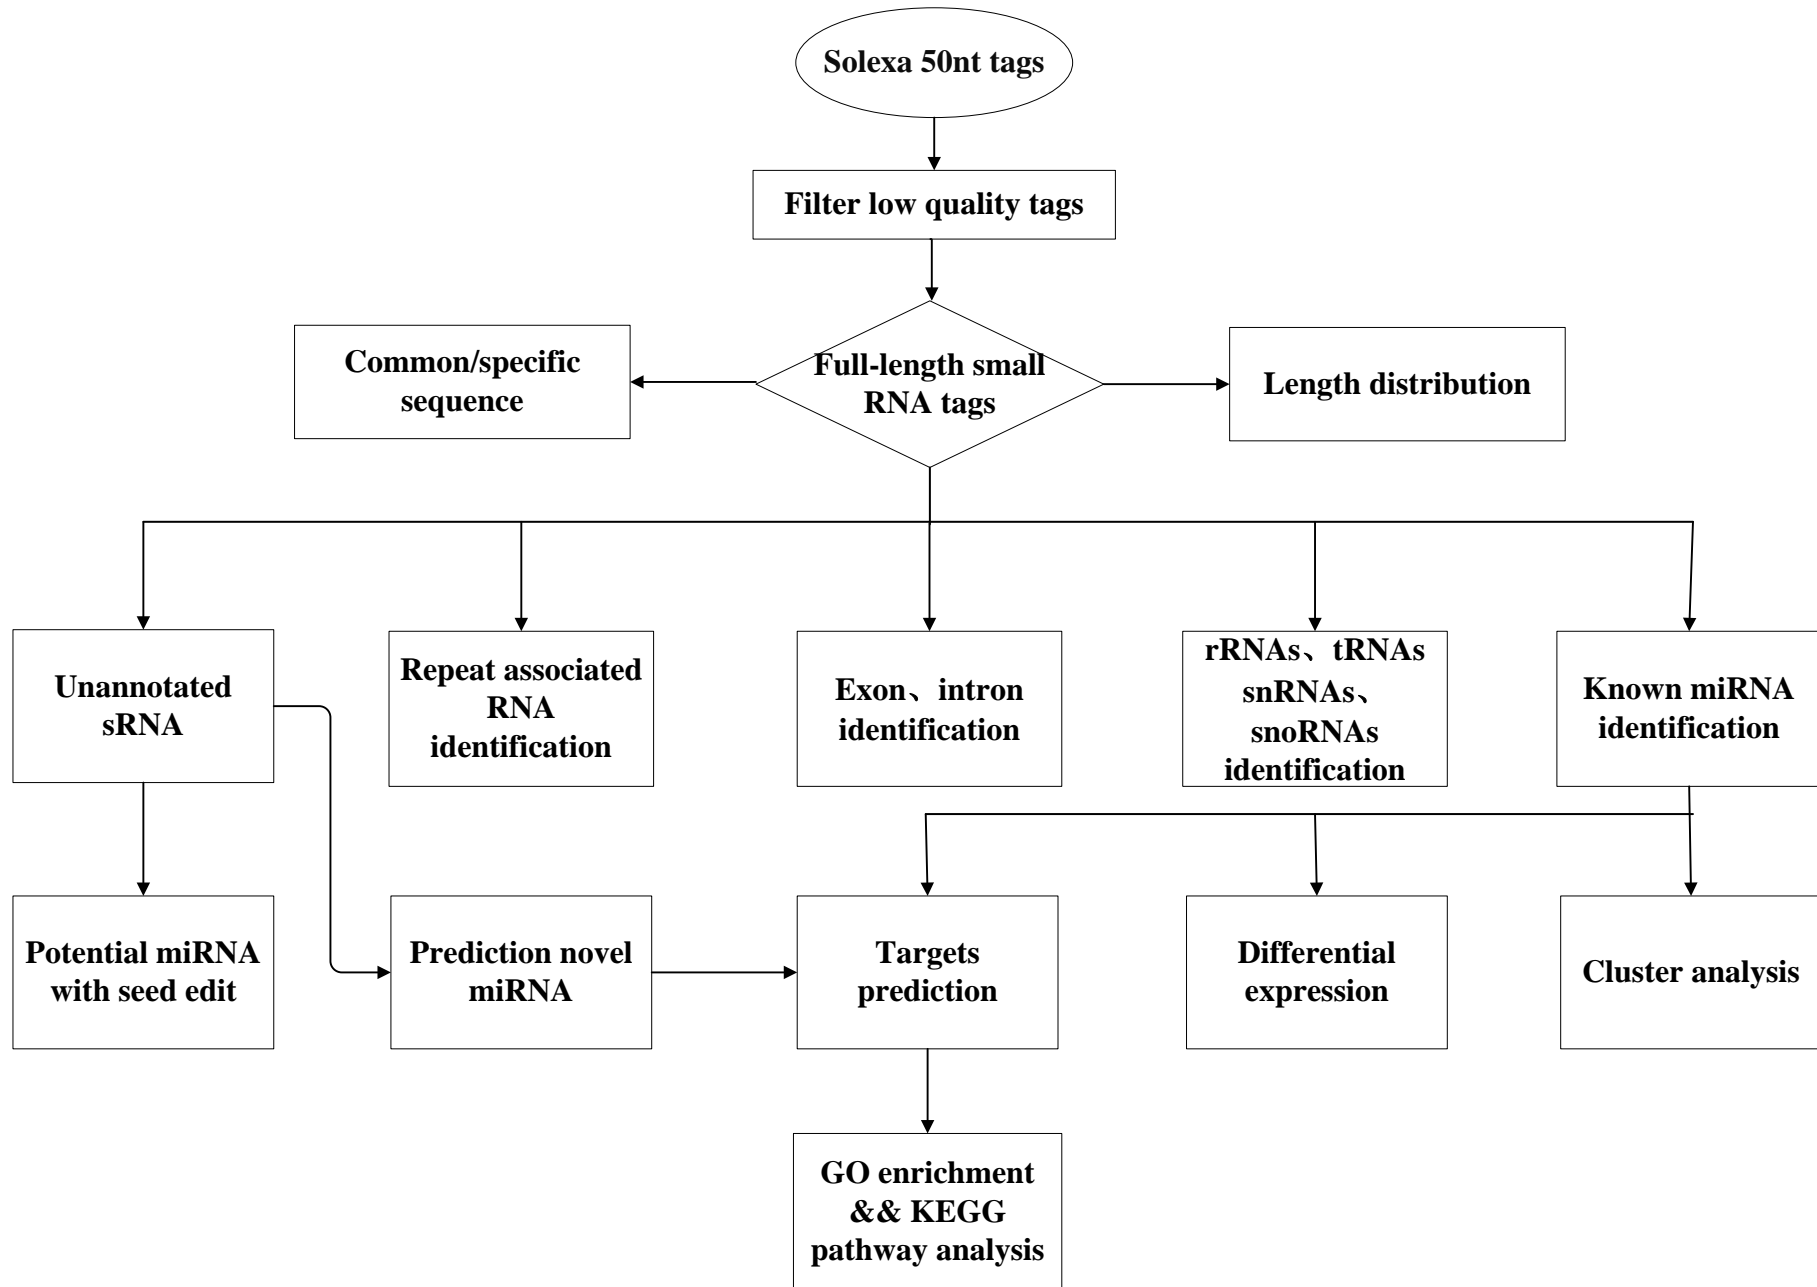

Supplement: 12864_2016_2591_MOESM2_ESM.pdf [file 12864_2016_2591_MOESM2_ESM.pdf]
